# Supplementary material
Source: Springer Nature journal article supplement (https://www.springermedizin.de/resource/supplementary/12875_2010_534_MOESM1_ESM.pdf/9434840)

**POCT**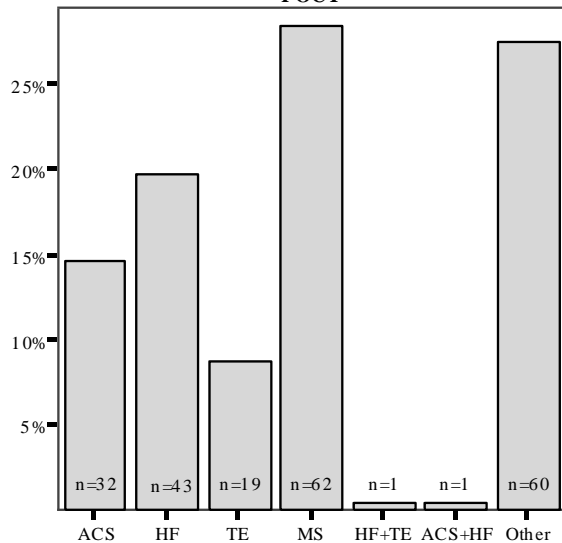**Working diagnoses****Controls**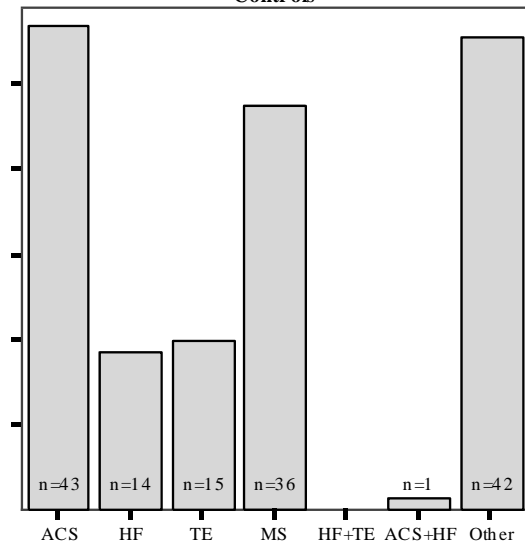**Working diagnoses**

Supplement: MOESM1 [file 9434840]
